# Supplementary material for: From complex questionnaire and interviewing data to intelligent Bayesian Network models for medical decision support
Source: PubMed Central journal article supplement — Artif Intell Med. Author manuscript; Available in PMC 2016 Apr 21. (PMC4839499; doi:10.1016/j.artmed.2016.01.002), 2016-01-16
Supplement: NIHMS67687-supplement-1.pdf [file NIHMS67687-supplement-1.pdf]

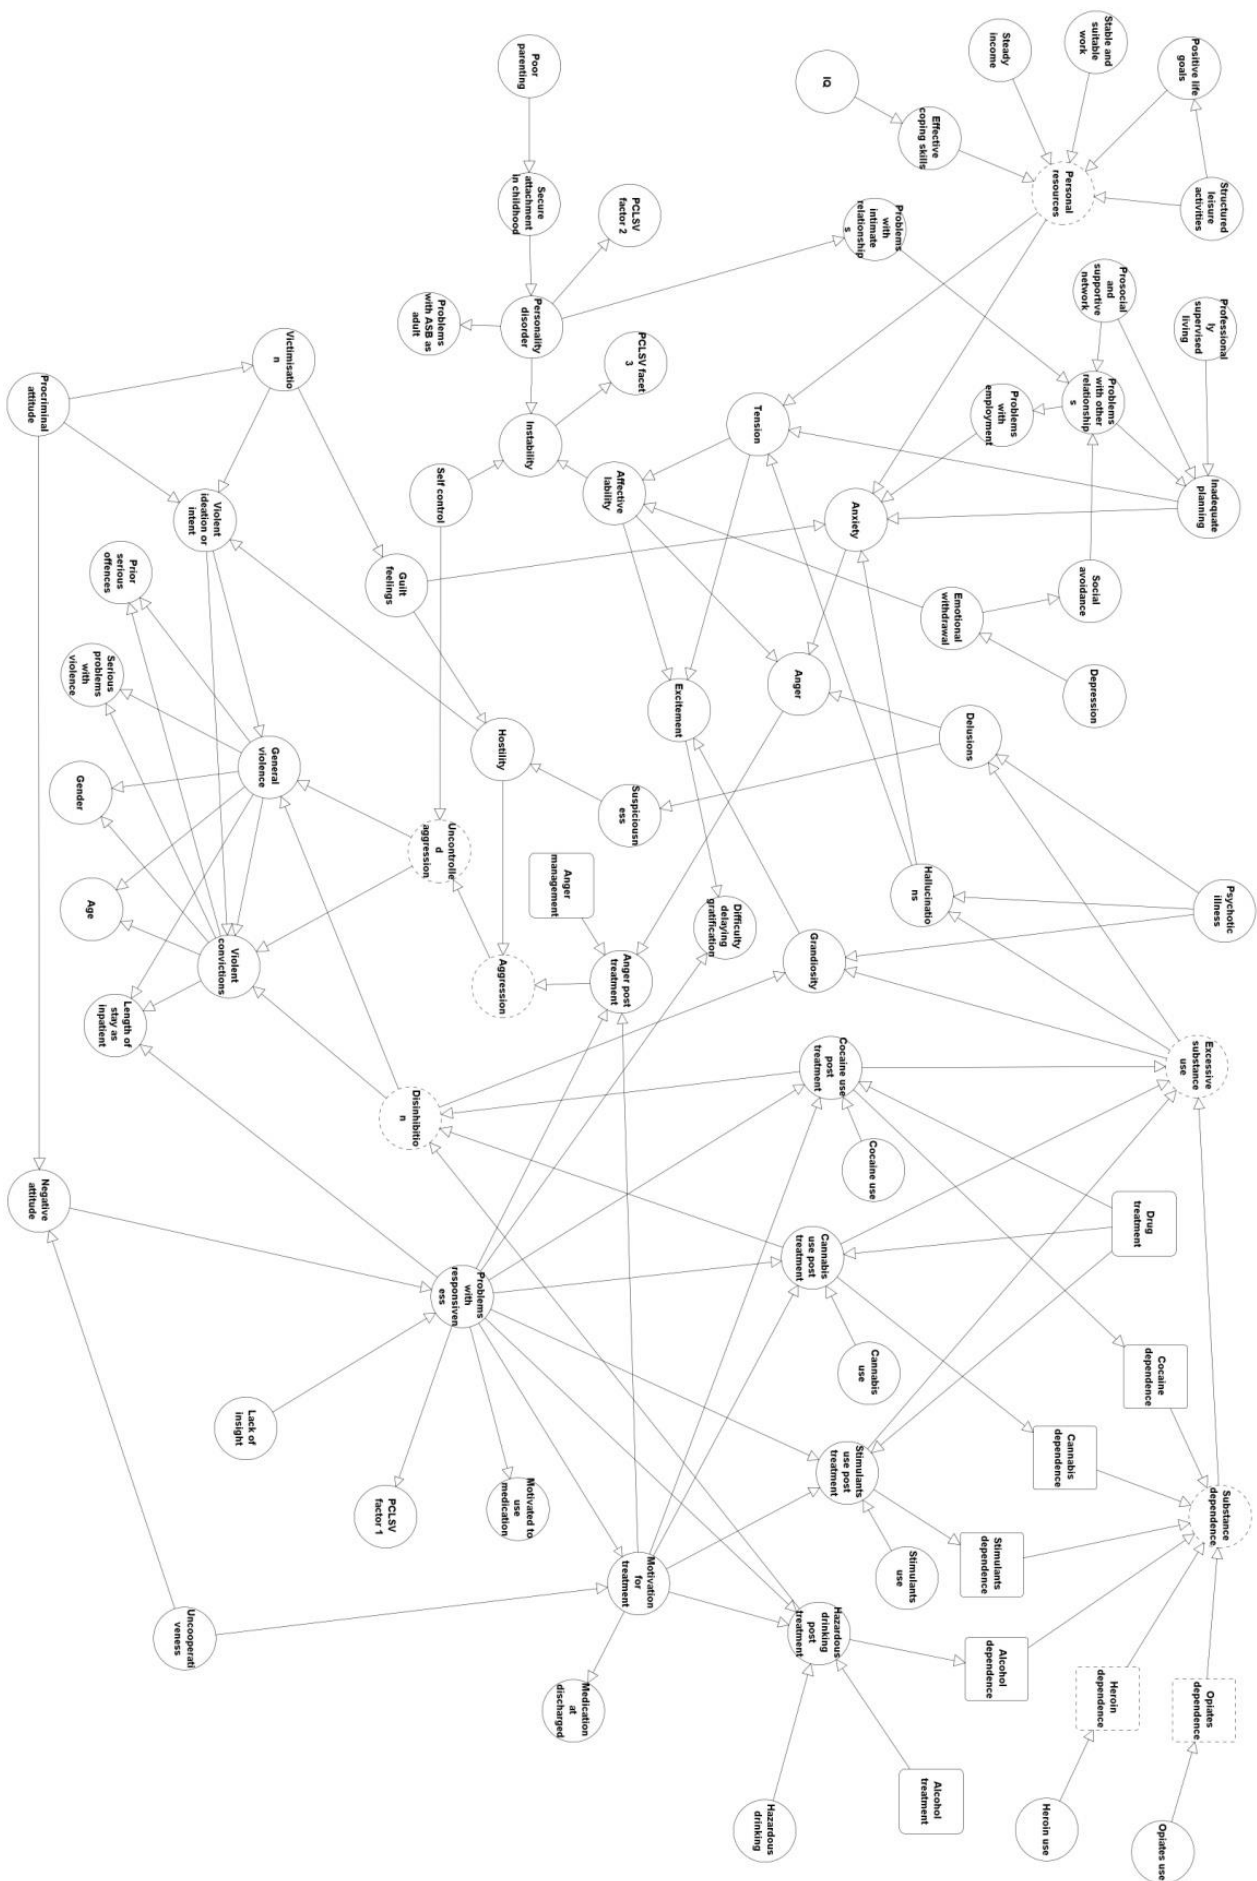

Figure A.2. The structure of the DSVM-MSS study [11].

**APPENDIX B: The BN model variables that have been downgraded in terms of complexity**

Table B.1. The BN model variables, from both the DSVM-P and DSVM-MSS studies, that have been downgraded, in terms of complexity, in order to reduce the risk of model *overfitting* as a result of limited data.

| Model    | Model variable                    | Values from data                                                                                                                                | States in the BN                                                                                                                                                                                                                                                                                                                                  |
|----------|-----------------------------------|-------------------------------------------------------------------------------------------------------------------------------------------------|---------------------------------------------------------------------------------------------------------------------------------------------------------------------------------------------------------------------------------------------------------------------------------------------------------------------------------------------------|
| DSVM-MSS | Age                               | 18 to 64 years                                                                                                                                  | 18-21/22-25/26-29/30-34/35-39/40-49/50-59/60+                                                                                                                                                                                                                                                                                                     |
| DSVM-MSS | Prior serious offences            | 0 to max                                                                                                                                        | None/One/2+                                                                                                                                                                                                                                                                                                                                       |
| DSVM-MSS | Length of stay as inpatient       | 7 to 7299 days                                                                                                                                  | Up to 1 year/Up to 2 years/Up to 5 years/5+ years                                                                                                                                                                                                                                                                                                 |
| DSVM-MSS | PCLSVF1                           | Score 1 to 12                                                                                                                                   | Low=0-1, Medium=2-5, High=6+                                                                                                                                                                                                                                                                                                                      |
| DSVM-MSS | PCLSVF2                           | Score 1 to 12                                                                                                                                   | Low=0-1, Medium=2-5, High=6+                                                                                                                                                                                                                                                                                                                      |
| DSVM-MSS | PCLSVF3                           | Score 1 to 6                                                                                                                                    | Low=0-1, Medium=2-3, High=4+                                                                                                                                                                                                                                                                                                                      |
| DSVM-MSS | IQ                                | Score 0 to max                                                                                                                                  | Low average/Average/High average                                                                                                                                                                                                                                                                                                                  |
| DSVM-MSS | Uncooperativeness                 | Score from 1 to 7                                                                                                                               | No=1, Partly=2-4, Yes=5+                                                                                                                                                                                                                                                                                                                          |
| DSVM-MSS | Social avoidance                  | Score from 1 to 7                                                                                                                               | No=1, Partly=2-4, Yes=5+                                                                                                                                                                                                                                                                                                                          |
| DSVM-MSS | Tension                           | Score from 1 to 7                                                                                                                               | No=1, Partly=2-4, Yes=5+                                                                                                                                                                                                                                                                                                                          |
| DSVM-MSS | Guilt feelings                    | Score from 1 to 7                                                                                                                               | No=1, Partly=2-4, Yes=5+                                                                                                                                                                                                                                                                                                                          |
| DSVM-MSS | Affective lability                | Score from 1 to 7                                                                                                                               | No=1, Partly=2-4, Yes=5+                                                                                                                                                                                                                                                                                                                          |
| DSVM-MSS | Anger                             | Score from 1 to 7                                                                                                                               | No=1, Partly=2-4, Yes=5+                                                                                                                                                                                                                                                                                                                          |
| DSVM-MSS | Excitement                        | Score from 1 to 7                                                                                                                               | No=1, Partly=2-4, Yes=5+                                                                                                                                                                                                                                                                                                                          |
| DSVM-MSS | Suspiciousness                    | Score from 1 to 7                                                                                                                               | No=1, Partly=2-4, Yes=5+                                                                                                                                                                                                                                                                                                                          |
| DSVM-MSS | Hostility                         | Score from 1 to 7                                                                                                                               | No=1, Partly=2-4, Yes=5+                                                                                                                                                                                                                                                                                                                          |
| DSVM-MSS | Difficulty delaying gratification | Score from 1 to 7                                                                                                                               | No=1, Partly=2-4, Yes=5+                                                                                                                                                                                                                                                                                                                          |
| DSVM-MSS | Emotional withdrawal              | Score from 1 to 7                                                                                                                               | No=1, Partly=2-4, Yes=5+                                                                                                                                                                                                                                                                                                                          |
| DSVM-MSS | Delusions                         | Score from 1 to 7                                                                                                                               | No=1, Partly=2-4, Yes=5+                                                                                                                                                                                                                                                                                                                          |
| DSVM-MSS | Hallucination                     | Score from 1 to 7                                                                                                                               | No=1, Partly=2-4, Yes=5+                                                                                                                                                                                                                                                                                                                          |
| DSVM-MSS | Grandiosity                       | Score from 1 to 7                                                                                                                               | No=1, Partly=2-4, Yes=5+                                                                                                                                                                                                                                                                                                                          |
| DSVM-MSS | Anxiety                           | Score from 1 to 7                                                                                                                               | No=1, Partly=2-4, Yes=5+                                                                                                                                                                                                                                                                                                                          |
| DSVM-MSS | Depression                        | Score from 1 to 7                                                                                                                               | No=1, Partly=2-4, Yes=5+                                                                                                                                                                                                                                                                                                                          |
| DSVM-P   | Age                               | 18 to 75 years                                                                                                                                  | 18-19/20-21/22-25/ 26-29/30-34/35-39/ 40-49/50-59/60+                                                                                                                                                                                                                                                                                             |
| DSVM-P   | Domestic stability                | a) Frequent address change: <i>Integer</i> ,<br>b) Eviction: <i>Boolean</i> ,<br>c) Family/friends unsupportive: <i>Score 1 to 10</i> .         | a) Frequent address change: No=0-3, Yes=4+,<br>b) Eviction: No=false, Yes=true,<br>c) Family/friends unsupportive: No=0-3, Yes=4+.<br><br><u>Rule introduced:</u> if at least two of the three variables above returns <i>Yes</i> , then <i>Domestic stability</i> =Low, otherwise <i>Domestic stability</i> =High.                               |
| DSVM-P   | Financial difficulties            | a) Behind paying bills: <i>Boolean</i> ,<br>b) Services cut off: <i>Boolean</i> ,<br>c) Low income: <i>Score from 0 to max</i> .                | a) Behind paying bills: No=false, Yes=true,<br>b) Services cut off: No=false, Yes=true,<br>c) Low income: No=50+, Yes=0-49.<br><br><u>Rule introduced:</u> if at least one of the three variables above returns <i>Yes</i> , then <i>Financial difficulties</i> =Yes, otherwise <i>Financial difficulties</i> =No.                                |
| DSVM-P   | Hazardous drinking                | Alcohol use disorder identification test (AUDIT): Score 0 to 32.                                                                                | No=0-1, Yes=8+                                                                                                                                                                                                                                                                                                                                    |
| DSVM-P   | Problematic life events           | a) Separation/divorce: <i>Boolean</i> ,<br>b) Problems with friends/family/neighbour: <i>Boolean</i> ,<br>c) Redundant/sucked: <i>Boolean</i> . | a) Separation/divorce: No=false, Yes=true,<br>b) Problems with friends/family/neighbour: No=false, Yes=true,<br>c) Redundant/sucked: No=false, Yes=true,<br><br><u>Rule introduced:</u> if at least one of the three variables above returns <i>Yes</i> , then <i>Problematic life events</i> =Yes, otherwise <i>Problematic life events</i> =No. |
| DSVM-P   | Stress                            | High stress score 0 to max                                                                                                                      | No=0-17, Yes=18+                                                                                                                                                                                                                                                                                                                                  |
| DSVM-P   | Intelligence                      | IQ Score 0 to 130                                                                                                                               | Extremely Low/ Borderline/ Low Average/Average/ High Average/Superior                                                                                                                                                                                                                                                                             |
| DSVM-P   | Criminal network                  | a) Family/friends have criminal convictions: <i>Boolean</i> ,<br>b) Family/friends offered                                                      | a) Family/friends have criminal convictions: No=false, Yes=true,<br>b) Family/friends offered drugs: No=false, Yes=true,                                                                                                                                                                                                                          |

|        |                                                                                   |                                                                                                                                                                                                                                              |                                                                                                                                                                                                                                                                                                                                                                                                                                             |
|--------|-----------------------------------------------------------------------------------|----------------------------------------------------------------------------------------------------------------------------------------------------------------------------------------------------------------------------------------------|---------------------------------------------------------------------------------------------------------------------------------------------------------------------------------------------------------------------------------------------------------------------------------------------------------------------------------------------------------------------------------------------------------------------------------------------|
|        |                                                                                   | <p>drugs: <i>Boolean</i>,</p> <p>c) Family/friends asked for money/goods through crime: <i>Boolean</i>,</p> <p>d) Family/friends suggested to commit a crime: <i>Boolean</i>,</p> <p>e) Family/friends got into a fight: <i>Boolean</i>.</p> | <p>c) Family/friends asked for money/goods through crime: No=<i>false</i>, Yes=<i>true</i>,</p> <p>d) Family/friends suggested to commit a crime: No=<i>false</i>, Yes=<i>true</i>,</p> <p>e) Family/friends got into a fight: No=<i>false</i>, Yes=<i>true</i>,</p> <p><u>Rule introduced:</u> if at least one of the five variables above returns <i>Yes</i>, then <i>Criminal network=Yes</i>, otherwise <i>Criminal network=No</i>.</p> |
| DSVM-P | Criminal attitude                                                                 | <p>a) OK to steal if very poor: Score 1 to 5,</p> <p>b) OK to steal from the rick: Score 1 to 5,</p> <p>c) OK to steal from shops that make lots of money: Score 1 to 5,</p> <p>d) Sometimes it is OK to break the law: Score 1 to 5,</p>    | <p>a) OK to steal if very poor: No=0-1, Yes=2+,</p> <p>b) OK to steal from the rick: No=0-1, Yes=2+,</p> <p>c) OK to steal from shops that make lots of money: No=0-1, Yes=2+,</p> <p>d) Sometimes it is OK to break the law: No=0-1, Yes=2+.</p> <p><u>Rule introduced:</u> if at least one of the four variables above returns <i>Yes</i>, then <i>Criminal attitude=Yes</i>, otherwise <i>Criminal attitude=No</i>.</p>                  |
| DSVM-P | Victimisation                                                                     | <p>a) Victim of theft/burglary: <i>Boolean</i>,</p> <p>b) Victim of threats: <i>Boolean</i>,</p> <p>c) Assaulted: <i>Boolean</i>.</p>                                                                                                        | <p>a) Victim of theft/burglary: No=<i>false</i>, Yes=<i>true</i>,</p> <p>b) Victim of threats: No=<i>false</i>, Yes=<i>true</i>,</p> <p>c) Assaulted: No=<i>false</i>, Yes=<i>true</i>.</p> <p><u>Rule introduced:</u> if at least one of the three variables above returns <i>Yes</i>, then <i>Criminal network=Yes</i>, otherwise <i>Criminal network=No</i>.</p>                                                                         |
| DSVM-P | Compliance with supervision                                                       | Number of appointments missed with probation officer: Score 0 to max                                                                                                                                                                         | No=0-1, Yes=2+.                                                                                                                                                                                                                                                                                                                                                                                                                             |
| DSVM-P | Anger                                                                             | STAXI trait score: Score 0 to 27                                                                                                                                                                                                             | No=0-2, Yes=3+.                                                                                                                                                                                                                                                                                                                                                                                                                             |
| DSVM-P | Cocaine (applies to all three cocaine variables; before, during and post-release) | <p>a) Cocaine powder: <i>Boolean</i>,</p> <p>b) Crack cocaine: <i>Boolean</i>,</p>                                                                                                                                                           | <p>a) Cocaine powder: No=<i>false</i>, Yes=<i>true</i>,</p> <p>b) Crack cocaine: No=<i>false</i>, Yes=<i>true</i>,</p> <p><u>Rule introduced:</u> if at least one of the two variables above returns <i>Yes</i>, then <i>Cocaine=Yes</i>, otherwise <i>Cocaine=No</i>.</p>                                                                                                                                                                  |
| DSVM-P | Responsiveness to treatment                                                       | <p>a) Not taken medication: <i>Boolean</i>,</p> <p>b) Missed injections: <i>Boolean</i>,</p>                                                                                                                                                 | <p>a) Not taken medication: No=<i>false</i>, Yes=<i>true</i>,</p> <p>b) Missed injections: No=<i>false</i>, Yes=<i>true</i>,</p> <p><u>Rule introduced:</u> if one of the two variables above returns <i>Yes</i>, then <i>Responsiveness to treatment=Partly</i>, if two of the variables above return <i>Yes</i>, then <i>Responsiveness to treatment=No</i>, otherwise <i>Responsiveness to treatment=Yes</i>.</p>                        |
| DSVM-P | PCLR Total score                                                                  | PCL-R: Score 0 to 35                                                                                                                                                                                                                         | 0-9/10-16/17-26/27+                                                                                                                                                                                                                                                                                                                                                                                                                         |
| DSVM-P | Prior convictions                                                                 | Score 0 to max                                                                                                                                                                                                                               | 0/1/2-5/6+                                                                                                                                                                                                                                                                                                                                                                                                                                  |
| DSVM-P | Prior acquisitive crime convictions                                               | Score 0 to max                                                                                                                                                                                                                               | 0-2/3-12/13+                                                                                                                                                                                                                                                                                                                                                                                                                                |
